# Supplementary material for: Breast Milk Virome and Bacterial Microbiome Resilience in Kenyan Women Living with HIV
Source: PubMed Central journal article supplement (PMC8546991; doi:10.1128/msystems.01079-20), 2021-03-16

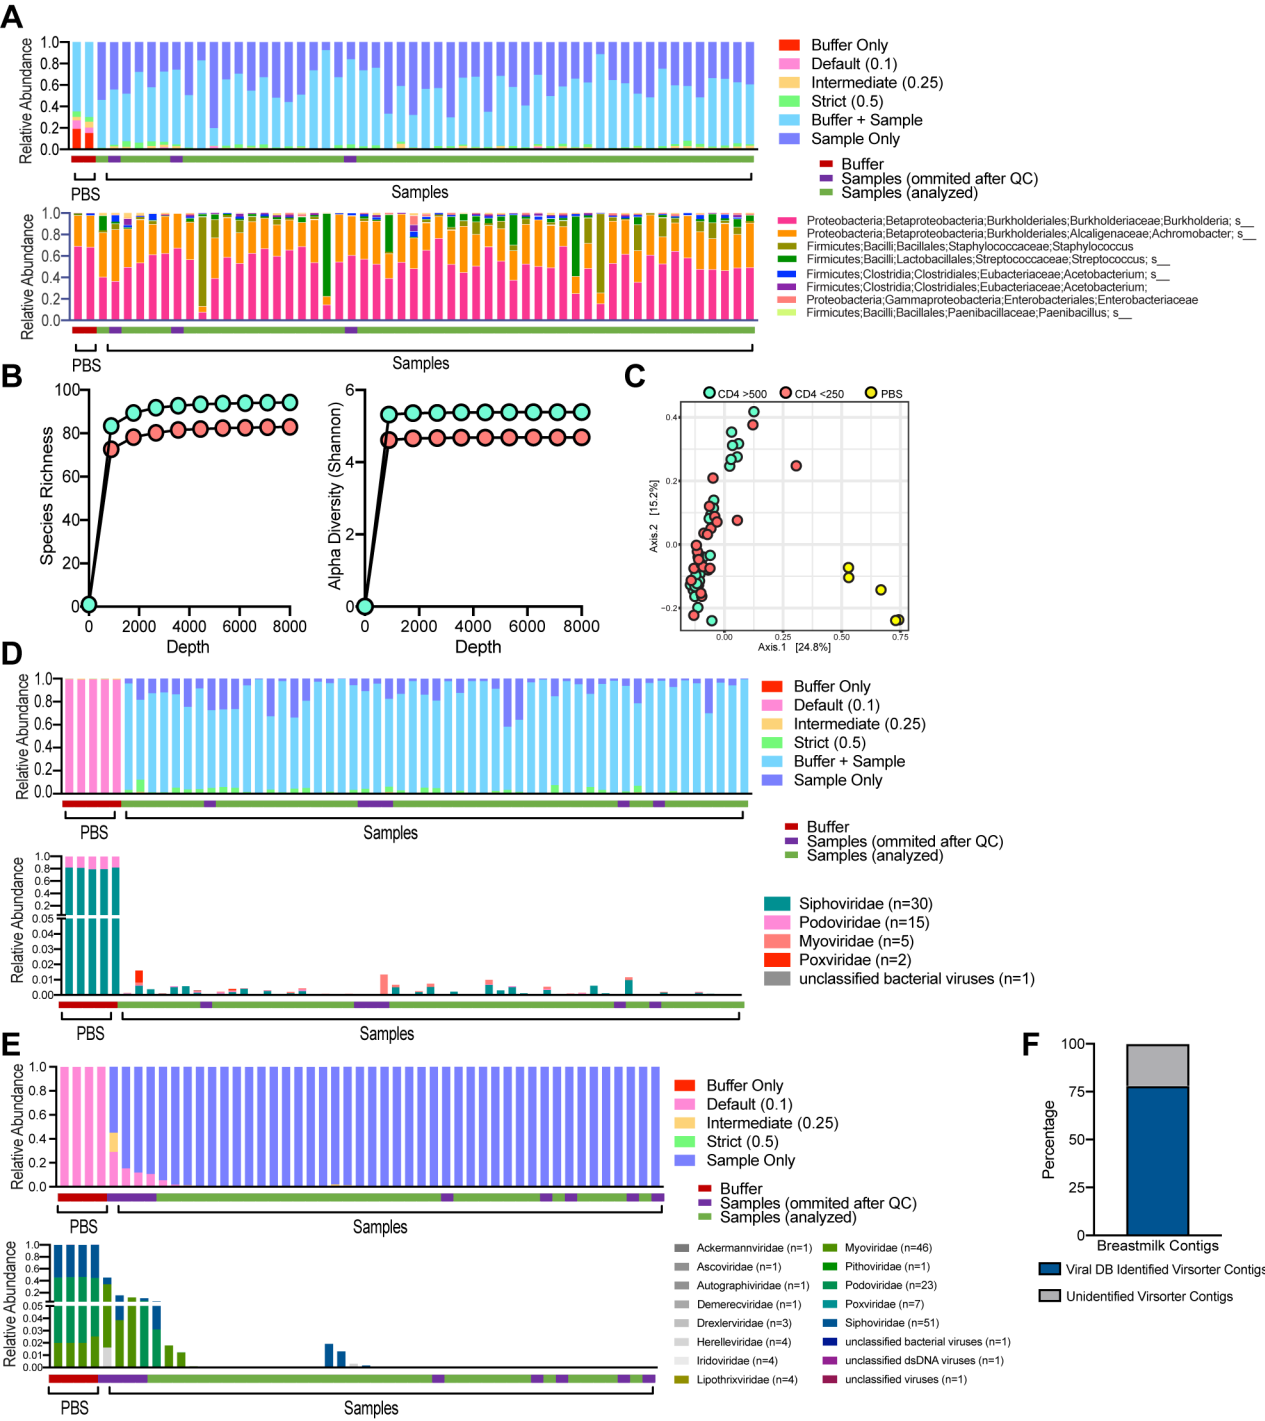

Supplement: msystems.01079-20-sf005.pdf [file msystems.01079-20-sf005.pdf]
